# Supplementary material for: Use of Immunization Information Systems in Ascertainment of COVID-19 Vaccinations for Claims-Based Vaccine Safety and Effectiveness Studies
Source: PubMed Central journal article supplement (PMC10189561; doi:10.1001/jamanetworkopen.2023.13512), 2023-05-16
Supplement: jamanetwopen-e2313512-s002.pdf [file jamanetwopen-e2313512-s002.pdf]

## Data Sharing Statement

Schneider. Use of Immunization Information Systems in Ascertainment of COVID-19 Vaccinations for Claims-Based Vaccine Safety and Effectiveness Studies. *JAMA Netw Open*. Published May 16, 2023. doi:10.1001/jamanetworkopen.2023.13512

### Data

**Data available:** No

### Additional Information

**Explanation for why data not available:** The medical and pharmacy claims data are proprietary data to Optum, and the data use agreements made with IIS limit the data to Optum's use.
